# Supplementary material
Source: Research Square preprint supplement (doi:10.21203/rs.3.rs-7893239/v1)
Supplement: Supplementary file 1 [file 2c86b24b351ca657640e7dea.docx]

**Near-term impacts of the 2024 mass coral bleaching event on benthic and fish communities in Okinawa Island, southern Japan**

*Coral Reefs*

Lucas Yutaka Kimura 1a*, Rickdane Gomez 1a, Takashi Nakamura 2,3

*Corresponding author affiliation:

Graduate School of Engineering and Science, University of the Ryukyus, 1 Senbaru, Nishihara, Okinawa, Japan 903-0213

*Corresponding author email:

lucaskimura0924@gmail.com

rickdanegomez@gmail.com

**Online resource 2a** SIMPER results for changes in benthic community composition by depth zone

| **Depth: Shallow** |  |  |  |  |  |  |  |  |
| --- | --- | --- | --- | --- | --- | --- | --- | --- |
| Pre vs. Intra |  |  |  |  |  |  |  |  |
|  | **average** | **sd** | **ratio** | **ava** | **avb** | **cumsum** | ***p*** |  |
| Hard coral | 0.117 | 0.086 | 1.368 | 0.466 | 0.505 | 0.290 | 0.997 |  |
| Turf algae | 0.096 | 0.068 | 1.410 | 0.288 | 0.273 | 0.529 | 0.763 |  |
| Soft coral | 0.050 | 0.086 | 0.578 | 0.062 | 0.057 | 0.653 | 0.412 |  |
| Coralline algae | 0.044 | 0.039 | 1.116 | 0.085 | 0.052 | 0.761 | 0.988 |  |
| Dead coral with algae | 0.025 | 0.037 | 0.697 | 0.000 | 0.051 | 0.825 | 1.000 |  |
| Macroalgae | 0.024 | 0.046 | 0.514 | 0.042 | 0.010 | 0.884 | 0.747 |  |
| Rubble | 0.021 | 0.064 | 0.332 | 0.028 | 0.017 | 0.937 | 0.495 |  |
| Bare rock | 0.011 | 0.011 | 0.996 | 0.021 | 0.011 | 0.965 | 0.785 |  |
| Other invertebrates | 0.007 | 0.007 | 0.930 | 0.008 | 0.011 | 0.982 | 0.912 |  |
| Cyanobacterial mat | 0.007 | 0.016 | 0.429 | 0.000 | 0.014 | 0.999 | 0.020 | * |
| Sand | 0.000 | 0.001 | 0.192 | 0.000 | 0.000 | 1.000 | 0.875 |  |
|  |  |  |  |  |  |  |  |  |
| Pre vs. Post |  |  |  |  |  |  |  |  |
|  | **average** | **sd** | **ratio** | **ava** | **avb** | **cumsum** | ***p*** |  |
| Hard coral | 0.166 | 0.108 | 1.544 | 0.466 | 0.145 | 0.285 | 0.001 | *** |
| Dead coral with algae | 0.134 | 0.127 | 1.057 | 0.000 | 0.269 | 0.515 | 0.001 | *** |
| Turf algae | 0.096 | 0.068 | 1.418 | 0.288 | 0.302 | 0.679 | 0.871 |  |
| Coralline algae | 0.060 | 0.058 | 1.036 | 0.085 | 0.136 | 0.782 | 0.112 |  |
| Soft coral | 0.047 | 0.081 | 0.575 | 0.062 | 0.048 | 0.861 | 0.571 |  |
| Macroalgae | 0.034 | 0.051 | 0.654 | 0.042 | 0.038 | 0.919 | 0.021 | * |
| Rubble | 0.023 | 0.076 | 0.306 | 0.028 | 0.020 | 0.959 | 0.454 |  |
| Bare rock | 0.013 | 0.012 | 1.080 | 0.021 | 0.022 | 0.981 | 0.077 | . |
| Other invertebrates | 0.009 | 0.009 | 1.000 | 0.008 | 0.016 | 0.996 | 0.030 | * |
| Cyanobacterial mat | 0.001 | 0.006 | 0.225 | 0.000 | 0.003 | 0.999 | 0.995 |  |
| Sand | 0.001 | 0.004 | 0.241 | 0.000 | 0.002 | 1.000 | 0.382 |  |
|  | 0.166 | 0.108 | 1.544 | 0.466 | 0.145 | 0.285 | 0.001 |  |
| Intra vs. Post |  |  |  |  |  |  |  |  |
|  | **average** | **sd** | **ratio** | **ava** | **avb** | **cumsum** | ***p*** |  |
| Hard coral | 0.185 | 0.105 | 1.764 | 0.505 | 0.145 | 0.313 | 0.001 | *** |
| Dead coral with algae | 0.124 | 0.118 | 1.045 | 0.051 | 0.269 | 0.522 | 0.001 | *** |
| Turf algae | 0.109 | 0.077 | 1.401 | 0.273 | 0.302 | 0.705 | 0.030 | * |
| Coralline algae | 0.063 | 0.063 | 1.005 | 0.052 | 0.136 | 0.811 | 0.041 | * |
| Soft coral | 0.045 | 0.080 | 0.564 | 0.057 | 0.048 | 0.887 | 0.633 |  |
| Macroalgae | 0.021 | 0.036 | 0.579 | 0.010 | 0.038 | 0.922 | 0.906 |  |
| Rubble | 0.018 | 0.062 | 0.284 | 0.017 | 0.020 | 0.952 | 0.698 |  |
| Bare rock | 0.012 | 0.012 | 0.953 | 0.011 | 0.022 | 0.972 | 0.712 |  |
| Other invertebrates | 0.008 | 0.007 | 1.095 | 0.011 | 0.016 | 0.985 | 0.444 |  |
| Cyanobacterial mat | 0.008 | 0.016 | 0.475 | 0.014 | 0.003 | 0.998 | 0.001 | *** |
| Sand | 0.001 | 0.004 | 0.288 | 0.000 | 0.002 | 1.000 | 0.215 |  |
|  |  |  |  |  |  |  |  |  |
| **Depth: Deep** |  |  |  |  |  |  |  |  |
| Pre vs. Intra |  |  |  |  |  |  |  |  |
|  | **average** | **sd** | **ratio** | **ava** | **avb** | **cumsum** | ***p*** |  |
| Hard coral | 0.1161 | 0.09126 | 1.2722 | 0.4589 | 0.4549 | 0.273 | 0.837 |  |
| Soft coral | 0.09068 | 0.12149 | 0.7464 | 0.1021 | 0.1402 | 0.486 | 0.286 |  |
| Turf algae | 0.07489 | 0.06249 | 1.1983 | 0.2443 | 0.2509 | 0.662 | 0.833 |  |
| Rubble | 0.04302 | 0.07866 | 0.5469 | 0.0425 | 0.0545 | 0.763 | 0.456 |  |
| Macroalgae | 0.03949 | 0.0768 | 0.5142 | 0.0732 | 0.0143 | 0.856 | 0.173 |  |
| Coralline algae | 0.0227 | 0.0212 | 1.0708 | 0.0421 | 0.0268 | 0.909 | 1 |  |
| Bare rock | 0.01341 | 0.01367 | 0.9808 | 0.0186 | 0.0192 | 0.941 | 0.813 |  |
| Other invertebrates | 0.00841 | 0.01249 | 0.6732 | 0.0111 | 0.0107 | 0.96 | 0.227 |  |
| Cyanobacterial mat | 0.00781 | 0.01052 | 0.7426 | 0 | 0.0156 | 0.979 | 0.004 | ** |
| Sand | 0.00591 | 0.00915 | 0.6458 | 0.0071 | 0.0067 | 0.993 | 0.877 |  |
| Dead coral with algae | 0.00313 | 0.00567 | 0.5514 | 0 | 0.0063 | 1 | 1 |  |
|  |  |  |  |  |  |  |  |  |
| Pre vs. Post |  |  |  |  |  |  |  |  |
|  | **average** | **sd** | **ratio** | **ava** | **avb** | **cumsum** | ***p*** |  |
| Hard coral | 0.132 | 0.090 | 1.462 | 0.459 | 0.347 | 0.274 | 0.024 | * |
| Turf algae | 0.082 | 0.065 | 1.258 | 0.244 | 0.282 | 0.445 | 0.359 |  |
| Soft coral | 0.076 | 0.109 | 0.702 | 0.102 | 0.093 | 0.604 | 0.819 |  |
| Dead coral with algae | 0.041 | 0.038 | 1.089 | 0.000 | 0.083 | 0.690 | 0.001 | *** |
| Macroalgae | 0.041 | 0.076 | 0.536 | 0.073 | 0.019 | 0.775 | 0.018 | * |
| Rubble | 0.039 | 0.081 | 0.481 | 0.043 | 0.043 | 0.856 | 0.684 |  |
| Coralline algae | 0.037 | 0.026 | 1.392 | 0.042 | 0.086 | 0.932 | 0.001 | *** |
| Bare rock | 0.015 | 0.019 | 0.792 | 0.019 | 0.024 | 0.964 | 0.488 |  |
| Sand | 0.008 | 0.013 | 0.631 | 0.007 | 0.011 | 0.980 | 0.232 |  |
| Other invertebrates | 0.007 | 0.012 | 0.603 | 0.011 | 0.007 | 0.995 | 0.696 |  |
| Cyanobacterial mat | 0.003 | 0.007 | 0.347 | 0.000 | 0.005 | 1.000 | 1.000 |  |
|  |  |  |  |  |  |  |  |  |
| Intra vs. Post |  |  |  |  |  |  |  |  |
|  | **average** | **sd** | **ratio** | **ava** | **avb** | **cumsum** | ***p*** |  |
| Hard coral | 0.122 | 0.077 | 1.573 | 0.455 | 0.347 | 0.260 | 0.497 |  |
| Soft coral | 0.089 | 0.120 | 0.736 | 0.140 | 0.093 | 0.450 | 0.338 |  |
| Turf algae | 0.083 | 0.065 | 1.273 | 0.251 | 0.282 | 0.626 | 0.361 |  |
| Rubble | 0.044 | 0.081 | 0.541 | 0.055 | 0.043 | 0.719 | 0.433 |  |
| Dead coral with algae | 0.040 | 0.037 | 1.091 | 0.006 | 0.083 | 0.804 | 0.001 | *** |
| Coralline algae | 0.038 | 0.028 | 1.361 | 0.027 | 0.086 | 0.886 | 0.001 | *** |
| Bare rock | 0.017 | 0.022 | 0.774 | 0.019 | 0.024 | 0.922 | 0.201 |  |
| Macroalgae | 0.013 | 0.019 | 0.711 | 0.014 | 0.019 | 0.951 | 0.996 |  |
| Cyanobacterial mat | 0.009 | 0.011 | 0.822 | 0.016 | 0.005 | 0.969 | 0.001 | *** |
| Sand | 0.008 | 0.011 | 0.676 | 0.007 | 0.011 | 0.985 | 0.434 |  |
| Other invertebrates | 0.007 | 0.008 | 0.827 | 0.011 | 0.007 | 1.000 | 0.674 |  |

**Online resource 2b** SIMPER results for changes in coral genera composition by depth zone

| **Depth: Shallow** |  |  |  |  |  |  |  |  |
| --- | --- | --- | --- | --- | --- | --- | --- | --- |
| Pre vs. Intra |  |  |  |  |  |  |  |  |
|  | **average** | **sd** | **ratio** | **ava** | **avb** | **cumsum** | ***p*** |  |
| *Acropora* | 0.178 | 0.135 | 1.318 | 0.502 | 0.473 | 0.326 | 0.936 |  |
| *Dipsastraea* | 0.045 | 0.038 | 1.189 | 0.065 | 0.084 | 0.407 | 0.954 |  |
| *Montipora* | 0.044 | 0.057 | 0.773 | 0.057 | 0.061 | 0.489 | 0.911 |  |
| *Porites* | 0.039 | 0.040 | 0.958 | 0.065 | 0.048 | 0.559 | 0.981 |  |
| *Cyphastrea* | 0.034 | 0.035 | 0.984 | 0.064 | 0.037 | 0.622 | 0.392 |  |
| *Goniastrea* | 0.033 | 0.028 | 1.163 | 0.062 | 0.044 | 0.682 | 0.976 |  |
| *Pocillopora* | 0.031 | 0.031 | 1.007 | 0.040 | 0.051 | 0.739 | 1.000 |  |
| *Favites* | 0.025 | 0.022 | 1.130 | 0.028 | 0.047 | 0.785 | 0.917 |  |
| *Platygyra* | 0.020 | 0.026 | 0.801 | 0.014 | 0.037 | 0.822 | 0.969 |  |
| *Astreopora* | 0.012 | 0.021 | 0.589 | 0.012 | 0.016 | 0.844 | 0.457 |  |
| *Merulina* | 0.011 | 0.015 | 0.744 | 0.011 | 0.016 | 0.864 | 0.173 |  |
| *Millepora* | 0.009 | 0.012 | 0.758 | 0.015 | 0.010 | 0.881 | 0.958 |  |
| *Lobophyllia* | 0.009 | 0.013 | 0.736 | 0.006 | 0.015 | 0.898 | 0.435 |  |
| *Astrea* | 0.008 | 0.013 | 0.613 | 0.011 | 0.008 | 0.913 | 0.955 |  |
| *Hydnophora* | 0.007 | 0.014 | 0.470 | 0.009 | 0.006 | 0.925 | 0.497 |  |
| *Echinopora* | 0.006 | 0.010 | 0.615 | 0.010 | 0.005 | 0.937 | 0.806 |  |
| *Leptastrea* | 0.006 | 0.015 | 0.400 | 0.003 | 0.010 | 0.948 | 0.783 |  |
| *Plesiastrea* | 0.005 | 0.008 | 0.629 | 0.005 | 0.007 | 0.957 | 0.009 | ** |
| *Galaxea* | 0.003 | 0.007 | 0.474 | 0.003 | 0.004 | 0.963 | 0.935 |  |
| *Coeloseris* | 0.003 | 0.013 | 0.243 | 0.006 | 0.000 | 0.969 | 0.924 |  |
| *Turbinaria* | 0.003 | 0.007 | 0.376 | 0.001 | 0.004 | 0.973 | 0.712 |  |
| *Psammocora* | 0.002 | 0.005 | 0.409 | 0.002 | 0.002 | 0.977 | 0.931 |  |
| *Leptoseris* | 0.002 | 0.007 | 0.309 | 0.001 | 0.003 | 0.981 | 0.063 | . |
| *Fungia* | 0.002 | 0.005 | 0.402 | 0.001 | 0.003 | 0.985 | 0.451 |  |
| *Goniopora* | 0.001 | 0.007 | 0.171 | 0.002 | 0.000 | 0.987 | 0.296 |  |
| *Cycloseris* | 0.001 | 0.004 | 0.259 | 0.000 | 0.002 | 0.989 | 0.001 | *** |
| *Pectinia* | 0.001 | 0.004 | 0.255 | 0.001 | 0.001 | 0.990 | 0.093 | . |
| *Gardineroseris* | 0.001 | 0.003 | 0.250 | 0.001 | 0.001 | 0.992 | 0.181 |  |
| *Pavona* | 0.001 | 0.002 | 0.275 | 0.000 | 0.001 | 0.993 | 0.960 |  |
| *Podabacia* | 0.001 | 0.003 | 0.242 | 0.001 | 0.000 | 0.994 | 0.285 |  |
| *Echinophyllia* | 0.001 | 0.003 | 0.239 | 0.001 | 0.000 | 0.995 | 0.903 |  |
| *Coelastrea* | 0.001 | 0.003 | 0.192 | 0.000 | 0.001 | 0.996 | 0.634 |  |
| *Caulastraea* | 0.001 | 0.003 | 0.192 | 0.000 | 0.001 | 0.997 | 0.001 | *** |
| *Mycedium* | 0.000 | 0.002 | 0.192 | 0.000 | 0.001 | 0.998 | 0.001 | *** |
| *Oulophyllia* | 0.000 | 0.002 | 0.192 | 0.000 | 0.001 | 0.999 | 0.001 | *** |
| *Heliopora* | 0.000 | 0.002 | 0.171 | 0.001 | 0.000 | 0.999 | 0.312 |  |
| *Stylophora* | 0.000 | 0.002 | 0.171 | 0.001 | 0.000 | 1.000 | 0.288 |  |
| *Sandalolitha* | 0.000 | 0.001 | 0.171 | 0.001 | 0.000 | 1.000 | 0.315 |  |
| *Acanthastrea* | 0.000 | 0.000 | NaN | 0.000 | 0.000 | 1.000 | NA |  |
| *Alveopora* | 0.000 | 0.000 | NaN | 0.000 | 0.000 | 1.000 | NA |  |
| *Bernardpora* | 0.000 | 0.000 | NaN | 0.000 | 0.000 | 1.000 | NA |  |
| *Blastomussa* | 0.000 | 0.000 | NaN | 0.000 | 0.000 | 1.000 | NA |  |
| *Ctenactis* | 0.000 | 0.000 | NaN | 0.000 | 0.000 | 1.000 | NA |  |
| *Diploastrea* | 0.000 | 0.000 | NaN | 0.000 | 0.000 | 1.000 | NA |  |
| *Fimbriaphyllia* | 0.000 | 0.000 | NaN | 0.000 | 0.000 | 1.000 | NA |  |
| *Herpolitha* | 0.000 | 0.000 | NaN | 0.000 | 0.000 | 1.000 | NA |  |
| *Isopora* | 0.000 | 0.000 | NaN | 0.000 | 0.000 | 1.000 | NA |  |
| *Leptoria* | 0.000 | 0.000 | NaN | 0.000 | 0.000 | 1.000 | NA |  |
| *Lithophyllon* | 0.000 | 0.000 | NaN | 0.000 | 0.000 | 1.000 | NA |  |
| *Oulastrea* | 0.000 | 0.000 | NaN | 0.000 | 0.000 | 1.000 | NA |  |
| *Oxyopora* | 0.000 | 0.000 | NaN | 0.000 | 0.000 | 1.000 | NA |  |
| *Pachyseris* | 0.000 | 0.000 | NaN | 0.000 | 0.000 | 1.000 | NA |  |
| *Plerogyra* | 0.000 | 0.000 | NaN | 0.000 | 0.000 | 1.000 | NA |  |
| *Seriatopora* | 0.000 | 0.000 | NaN | 0.000 | 0.000 | 1.000 | NA |  |
| *Stylocoeniella* | 0.000 | 0.000 | NaN | 0.000 | 0.000 | 1.000 | NA |  |
|  |  |  |  |  |  |  |  |  |
| Pre vs. Post |  |  |  |  |  |  |  |  |
|  | **average** | **sd** | **ratio** | **ava** | **avb** | **cumsum** | ***p*** |  |
| *Acropora* | 0.233 | 0.155 | 1.507 | 0.502 | 0.105 | 0.300 | 0.001 | *** |
| *Pocillopora* | 0.073 | 0.107 | 0.678 | 0.040 | 0.133 | 0.394 | 0.004 | ** |
| *Montipora* | 0.063 | 0.099 | 0.634 | 0.057 | 0.097 | 0.474 | 0.260 |  |
| *Dipsastraea* | 0.055 | 0.053 | 1.050 | 0.065 | 0.108 | 0.546 | 0.152 |  |
| *Porites* | 0.055 | 0.057 | 0.958 | 0.065 | 0.093 | 0.616 | 0.043 | * |
| *Goniastrea* | 0.045 | 0.047 | 0.961 | 0.062 | 0.077 | 0.674 | 0.057 | . |
| *Cyphastrea* | 0.036 | 0.036 | 1.007 | 0.064 | 0.043 | 0.720 | 0.153 |  |
| *Favites* | 0.033 | 0.044 | 0.740 | 0.028 | 0.061 | 0.762 | 0.272 |  |
| *Platygyra* | 0.030 | 0.040 | 0.735 | 0.014 | 0.056 | 0.801 | 0.243 |  |
| *Millepora* | 0.023 | 0.050 | 0.454 | 0.015 | 0.035 | 0.830 | 0.068 | . |
| *Galaxea* | 0.018 | 0.059 | 0.297 | 0.003 | 0.033 | 0.852 | 0.146 |  |
| *Astrea* | 0.016 | 0.032 | 0.496 | 0.011 | 0.024 | 0.873 | 0.178 |  |
| *Pavona* | 0.013 | 0.047 | 0.276 | 0.000 | 0.026 | 0.889 | 0.052 | . |
| *Coeloseris* | 0.013 | 0.044 | 0.296 | 0.006 | 0.021 | 0.906 | 0.022 | * |
| *Astreopora* | 0.011 | 0.019 | 0.560 | 0.012 | 0.013 | 0.920 | 0.705 |  |
| *Echinopora* | 0.009 | 0.016 | 0.541 | 0.010 | 0.010 | 0.932 | 0.177 |  |
| *Merulina* | 0.008 | 0.013 | 0.670 | 0.011 | 0.009 | 0.943 | 0.861 |  |
| *Lobophyllia* | 0.008 | 0.016 | 0.479 | 0.006 | 0.011 | 0.953 | 0.807 |  |
| *Hydnophora* | 0.007 | 0.014 | 0.474 | 0.009 | 0.006 | 0.961 | 0.416 |  |
| *Leptastrea* | 0.007 | 0.013 | 0.515 | 0.003 | 0.012 | 0.970 | 0.686 |  |
| *Psammocora* | 0.006 | 0.020 | 0.328 | 0.002 | 0.011 | 0.978 | 0.217 |  |
| *Turbinaria* | 0.003 | 0.008 | 0.341 | 0.001 | 0.005 | 0.982 | 0.695 |  |
| *Plesiastrea* | 0.002 | 0.006 | 0.386 | 0.005 | 0.000 | 0.985 | 0.951 |  |
| *Echinophyllia* | 0.002 | 0.007 | 0.317 | 0.001 | 0.003 | 0.988 | 0.067 | . |
| *Pachyseris* | 0.002 | 0.010 | 0.177 | 0.000 | 0.004 | 0.990 | 0.001 | *** |
| *Fungia* | 0.002 | 0.007 | 0.242 | 0.001 | 0.002 | 0.992 | 0.773 |  |
| *Goniopora* | 0.001 | 0.007 | 0.171 | 0.002 | 0.000 | 0.994 | 0.339 |  |
| *Acanthastrea* | 0.001 | 0.005 | 0.177 | 0.000 | 0.002 | 0.995 | 0.001 | *** |
| *Coelastrea* | 0.001 | 0.005 | 0.177 | 0.000 | 0.002 | 0.996 | 0.509 |  |
| *Podabacia* | 0.001 | 0.003 | 0.242 | 0.001 | 0.000 | 0.997 | 0.257 |  |
| *Bernardpora* | 0.001 | 0.003 | 0.177 | 0.000 | 0.001 | 0.997 | 0.001 | *** |
| *Leptoseris* | 0.001 | 0.003 | 0.171 | 0.001 | 0.000 | 0.998 | 0.891 |  |
| *Gardineroseris* | 0.000 | 0.002 | 0.171 | 0.001 | 0.000 | 0.999 | 0.583 |  |
| *Pectinia* | 0.000 | 0.002 | 0.171 | 0.001 | 0.000 | 0.999 | 0.807 |  |
| *Heliopora* | 0.000 | 0.002 | 0.171 | 0.001 | 0.000 | 0.999 | 0.335 |  |
| *Stylophora* | 0.000 | 0.002 | 0.171 | 0.001 | 0.000 | 1.000 | 0.343 |  |
| *Sandalolitha* | 0.000 | 0.001 | 0.171 | 0.001 | 0.000 | 1.000 | 0.340 |  |
| *Alveopora* | 0.000 | 0.000 | NaN | 0.000 | 0.000 | 1.000 | NA |  |
| *Blastomussa* | 0.000 | 0.000 | NaN | 0.000 | 0.000 | 1.000 | NA |  |
| *Caulastraea* | 0.000 | 0.000 | NaN | 0.000 | 0.000 | 1.000 | NA |  |
| *Ctenactis* | 0.000 | 0.000 | NaN | 0.000 | 0.000 | 1.000 | NA |  |
| *Cycloseris* | 0.000 | 0.000 | NaN | 0.000 | 0.000 | 1.000 | NA |  |
| *Diploastrea* | 0.000 | 0.000 | NaN | 0.000 | 0.000 | 1.000 | NA |  |
| *Fimbriaphyllia* | 0.000 | 0.000 | NaN | 0.000 | 0.000 | 1.000 | NA |  |
| *Herpolitha* | 0.000 | 0.000 | NaN | 0.000 | 0.000 | 1.000 | NA |  |
| *Isopora* | 0.000 | 0.000 | NaN | 0.000 | 0.000 | 1.000 | NA |  |
| *Leptoria* | 0.000 | 0.000 | NaN | 0.000 | 0.000 | 1.000 | NA |  |
| *Lithophyllon* | 0.000 | 0.000 | NaN | 0.000 | 0.000 | 1.000 | NA |  |
| *Mycedium* | 0.000 | 0.000 | NaN | 0.000 | 0.000 | 1.000 | NA |  |
| *Oulastrea* | 0.000 | 0.000 | NaN | 0.000 | 0.000 | 1.000 | NA |  |
| *Oulophyllia* | 0.000 | 0.000 | NaN | 0.000 | 0.000 | 1.000 | NA |  |
| *Oxyopora* | 0.000 | 0.000 | NaN | 0.000 | 0.000 | 1.000 | NA |  |
| *Plerogyra* | 0.000 | 0.000 | NaN | 0.000 | 0.000 | 1.000 | NA |  |
| *Seriatopora* | 0.000 | 0.000 | NaN | 0.000 | 0.000 | 1.000 | NA |  |
| *Stylocoeniella* | 0.000 | 0.000 | NaN | 0.000 | 0.000 | 1.000 | NA |  |
|  |  |  |  |  |  |  |  |  |
| Intra vs. Post |  |  |  |  |  |  |  |  |
|  | **average** | **sd** | **ratio** | **ava** | **avb** | **cumsum** | ***p*** |  |
| *Acropora* | 0.221 | 0.154 | 1.436 | 0.473 | 0.105 | 0.289 | 0.001 | *** |
| *Pocillopora* | 0.075 | 0.105 | 0.711 | 0.051 | 0.133 | 0.387 | 0.038 | * |
| *Montipora* | 0.062 | 0.099 | 0.630 | 0.061 | 0.097 | 0.468 | 0.318 |  |
| *Dipsastraea* | 0.055 | 0.049 | 1.131 | 0.084 | 0.108 | 0.541 | 0.181 |  |
| *Porites* | 0.051 | 0.057 | 0.891 | 0.048 | 0.093 | 0.608 | 0.329 |  |
| *Goniastrea* | 0.042 | 0.049 | 0.862 | 0.044 | 0.077 | 0.662 | 0.373 |  |
| *Favites* | 0.035 | 0.042 | 0.831 | 0.047 | 0.061 | 0.708 | 0.117 |  |
| *Platygyra* | 0.034 | 0.039 | 0.881 | 0.037 | 0.056 | 0.752 | 0.019 | * |
| *Cyphastrea* | 0.028 | 0.029 | 0.980 | 0.037 | 0.043 | 0.789 | 0.946 |  |
| *Millepora* | 0.021 | 0.050 | 0.421 | 0.010 | 0.035 | 0.817 | 0.332 |  |
| *Galaxea* | 0.018 | 0.059 | 0.308 | 0.004 | 0.033 | 0.841 | 0.262 |  |
| *Astrea* | 0.015 | 0.032 | 0.464 | 0.008 | 0.024 | 0.860 | 0.328 |  |
| *Pavona* | 0.014 | 0.047 | 0.290 | 0.001 | 0.026 | 0.878 | 0.185 |  |
| *Astreopora* | 0.013 | 0.023 | 0.555 | 0.016 | 0.013 | 0.894 | 0.346 |  |
| *Lobophyllia* | 0.011 | 0.015 | 0.719 | 0.015 | 0.011 | 0.908 | 0.109 |  |
| *Coeloseris* | 0.010 | 0.044 | 0.239 | 0.000 | 0.021 | 0.922 | 0.557 |  |
| *Merulina* | 0.010 | 0.014 | 0.717 | 0.016 | 0.009 | 0.935 | 0.400 |  |
| *Leptastrea* | 0.010 | 0.017 | 0.558 | 0.010 | 0.012 | 0.948 | 0.041 | * |
| *Echinopora* | 0.007 | 0.016 | 0.443 | 0.005 | 0.010 | 0.957 | 0.645 |  |
| *Psammocora* | 0.006 | 0.020 | 0.323 | 0.002 | 0.011 | 0.965 | 0.318 |  |
| *Hydnophora* | 0.005 | 0.010 | 0.535 | 0.006 | 0.006 | 0.972 | 0.769 |  |
| *Turbinaria* | 0.004 | 0.009 | 0.454 | 0.004 | 0.005 | 0.978 | 0.079 | . |
| *Plesiastrea* | 0.004 | 0.007 | 0.489 | 0.007 | 0.000 | 0.982 | 0.436 |  |
| *Fungia* | 0.002 | 0.007 | 0.372 | 0.003 | 0.002 | 0.986 | 0.285 |  |
| *Pachyseris* | 0.002 | 0.010 | 0.177 | 0.000 | 0.004 | 0.988 | 0.289 |  |
| *Echinophyllia* | 0.002 | 0.007 | 0.244 | 0.000 | 0.003 | 0.990 | 0.506 |  |
| *Leptoseris* | 0.002 | 0.006 | 0.261 | 0.003 | 0.000 | 0.992 | 0.280 |  |
| *Coelastrea* | 0.001 | 0.005 | 0.254 | 0.001 | 0.002 | 0.994 | 0.185 |  |
| *Cycloseris* | 0.001 | 0.004 | 0.259 | 0.002 | 0.000 | 0.995 | 0.001 | *** |
| *Acanthastrea* | 0.001 | 0.005 | 0.177 | 0.000 | 0.002 | 0.997 | 0.297 |  |
| *Bernardpora* | 0.001 | 0.003 | 0.177 | 0.000 | 0.001 | 0.997 | 0.286 |  |
| *Pectinia* | 0.001 | 0.003 | 0.192 | 0.001 | 0.000 | 0.998 | 0.377 |  |
| *Caulastraea* | 0.001 | 0.003 | 0.192 | 0.001 | 0.000 | 0.999 | 0.001 | *** |
| *Mycedium* | 0.000 | 0.002 | 0.192 | 0.001 | 0.000 | 0.999 | 0.001 | *** |
| *Oulophyllia* | 0.000 | 0.002 | 0.192 | 0.001 | 0.000 | 1.000 | 0.001 | *** |
| *Gardineroseris* | 0.000 | 0.002 | 0.192 | 0.001 | 0.000 | 1.000 | 0.620 |  |
| *Alveopora* | 0.000 | 0.000 | NaN | 0.000 | 0.000 | 1.000 | NA |  |
| *Blastomussa* | 0.000 | 0.000 | NaN | 0.000 | 0.000 | 1.000 | NA |  |
| *Ctenactis* | 0.000 | 0.000 | NaN | 0.000 | 0.000 | 1.000 | NA |  |
| *Diploastrea* | 0.000 | 0.000 | NaN | 0.000 | 0.000 | 1.000 | NA |  |
| *Fimbriaphyllia* | 0.000 | 0.000 | NaN | 0.000 | 0.000 | 1.000 | NA |  |
| *Goniopora* | 0.000 | 0.000 | NaN | 0.000 | 0.000 | 1.000 | NA |  |
| *Heliopora* | 0.000 | 0.000 | NaN | 0.000 | 0.000 | 1.000 | NA |  |
| *Herpolitha* | 0.000 | 0.000 | NaN | 0.000 | 0.000 | 1.000 | NA |  |
| *Isopora* | 0.000 | 0.000 | NaN | 0.000 | 0.000 | 1.000 | NA |  |
| *Leptoria* | 0.000 | 0.000 | NaN | 0.000 | 0.000 | 1.000 | NA |  |
| *Lithophyllon* | 0.000 | 0.000 | NaN | 0.000 | 0.000 | 1.000 | NA |  |
| *Oulastrea* | 0.000 | 0.000 | NaN | 0.000 | 0.000 | 1.000 | NA |  |
| *Oxyopora* | 0.000 | 0.000 | NaN | 0.000 | 0.000 | 1.000 | NA |  |
| *Plerogyra* | 0.000 | 0.000 | NaN | 0.000 | 0.000 | 1.000 | NA |  |
| *Podabacia* | 0.000 | 0.000 | NaN | 0.000 | 0.000 | 1.000 | NA |  |
| *Sandalolitha* | 0.000 | 0.000 | NaN | 0.000 | 0.000 | 1.000 | NA |  |
| *Seriatopora* | 0.000 | 0.000 | NaN | 0.000 | 0.000 | 1.000 | NA |  |
| *Stylocoeniella* | 0.000 | 0.000 | NaN | 0.000 | 0.000 | 1.000 | NA |  |
| *Stylophora* | 0.000 | 0.000 | NaN | 0.000 | 0.000 | 1.000 | NA |  |
|  |  |  |  |  |  |  |  |  |
| **Depth: Deep** |  |  |  |  |  |  |  |  |
| Pre vs. Intra |  |  |  |  |  |  |  |  |
|  | **average** | **sd** | **ratio** | **ava** | **avb** | **cumsum** | ***p*** |  |
| *Acropora* | 0.099 | 0.090 | 1.108 | 0.192 | 0.128 | 0.148 | 0.845 |  |
| *Porites* | 0.066 | 0.054 | 1.233 | 0.138 | 0.121 | 0.246 | 0.613 |  |
| *Merulina* | 0.044 | 0.078 | 0.562 | 0.073 | 0.060 | 0.311 | 0.491 |  |
| *Pocillopora* | 0.036 | 0.042 | 0.852 | 0.047 | 0.056 | 0.364 | 0.211 |  |
| *Echinophyllia* | 0.036 | 0.038 | 0.944 | 0.052 | 0.047 | 0.417 | 0.794 |  |
| *Dipsastraea* | 0.030 | 0.022 | 1.377 | 0.059 | 0.081 | 0.461 | 0.973 |  |
| *Echinopora* | 0.028 | 0.040 | 0.697 | 0.031 | 0.045 | 0.503 | 0.697 |  |
| *Mycedium* | 0.027 | 0.035 | 0.788 | 0.026 | 0.043 | 0.543 | 0.826 |  |
| *Pachyseris* | 0.026 | 0.091 | 0.283 | 0.006 | 0.050 | 0.582 | 0.186 |  |
| *Platygyra* | 0.024 | 0.022 | 1.062 | 0.048 | 0.044 | 0.617 | 0.898 |  |
| *Pectinia* | 0.024 | 0.038 | 0.629 | 0.016 | 0.043 | 0.652 | 0.555 |  |
| *Favites* | 0.023 | 0.028 | 0.843 | 0.045 | 0.036 | 0.687 | 0.670 |  |
| *Montipora* | 0.020 | 0.031 | 0.633 | 0.036 | 0.014 | 0.716 | 0.232 |  |
| *Millepora* | 0.019 | 0.034 | 0.568 | 0.022 | 0.023 | 0.744 | 0.773 |  |
| *Goniastrea* | 0.018 | 0.018 | 0.968 | 0.025 | 0.026 | 0.770 | 0.548 |  |
| *Cyphastrea* | 0.016 | 0.022 | 0.742 | 0.030 | 0.016 | 0.795 | 0.597 |  |
| *Turbinaria* | 0.016 | 0.023 | 0.691 | 0.020 | 0.022 | 0.819 | 0.215 |  |
| *Lobophyllia* | 0.015 | 0.018 | 0.862 | 0.010 | 0.028 | 0.841 | 0.813 |  |
| *Astreopora* | 0.012 | 0.023 | 0.544 | 0.013 | 0.016 | 0.859 | 0.576 |  |
| *Stylocoeniella* | 0.011 | 0.028 | 0.386 | 0.018 | 0.006 | 0.875 | 0.088 | . |
| *Galaxea* | 0.010 | 0.014 | 0.754 | 0.019 | 0.009 | 0.891 | 0.371 |  |
| *Hydnophora* | 0.010 | 0.016 | 0.608 | 0.013 | 0.011 | 0.906 | 0.421 |  |
| *Psammocora* | 0.008 | 0.018 | 0.447 | 0.012 | 0.006 | 0.918 | 0.912 |  |
| *Plesiastrea* | 0.007 | 0.012 | 0.554 | 0.004 | 0.010 | 0.927 | 0.107 |  |
| *Leptoseris* | 0.006 | 0.013 | 0.441 | 0.005 | 0.008 | 0.936 | 0.015 | * |
| *Astrea* | 0.006 | 0.009 | 0.631 | 0.005 | 0.008 | 0.945 | 0.491 |  |
| *Pavona* | 0.004 | 0.011 | 0.362 | 0.006 | 0.003 | 0.950 | 0.691 |  |
| *Cycloseris* | 0.004 | 0.008 | 0.446 | 0.001 | 0.006 | 0.956 | 0.590 |  |
| *Oxyopora* | 0.003 | 0.010 | 0.313 | 0.006 | 0.000 | 0.960 | 0.217 |  |
| *Isopora* | 0.003 | 0.011 | 0.258 | 0.004 | 0.002 | 0.964 | 0.412 |  |
| *Fungia* | 0.003 | 0.011 | 0.237 | 0.004 | 0.002 | 0.968 | 0.251 |  |
| *Diploastrea* | 0.002 | 0.006 | 0.445 | 0.003 | 0.002 | 0.972 | 0.349 |  |
| *Stylophora* | 0.002 | 0.006 | 0.421 | 0.001 | 0.004 | 0.976 | 0.887 |  |
| *Seriatopora* | 0.002 | 0.006 | 0.369 | 0.002 | 0.003 | 0.979 | 0.056 | . |
| *Goniopora* | 0.002 | 0.010 | 0.231 | 0.001 | 0.004 | 0.983 | 0.525 |  |
| *Plerogyra* | 0.002 | 0.012 | 0.192 | 0.000 | 0.004 | 0.986 | 0.001 | *** |
| *Leptastrea* | 0.002 | 0.005 | 0.447 | 0.002 | 0.002 | 0.989 | 0.943 |  |
| *Lithophyllon* | 0.002 | 0.006 | 0.252 | 0.000 | 0.003 | 0.991 | 0.922 |  |
| *Blastomussa* | 0.001 | 0.006 | 0.192 | 0.000 | 0.002 | 0.993 | 0.001 | *** |
| *Podabacia* | 0.001 | 0.005 | 0.192 | 0.000 | 0.002 | 0.994 | 0.001 | *** |
| *Leptoria* | 0.001 | 0.003 | 0.246 | 0.002 | 0.000 | 0.995 | 0.285 |  |
| *Caulastraea* | 0.000 | 0.002 | 0.192 | 0.000 | 0.001 | 0.996 | 0.807 |  |
| *Acanthastrea* | 0.000 | 0.002 | 0.192 | 0.000 | 0.001 | 0.997 | 0.001 | *** |
| *Oulastrea* | 0.000 | 0.002 | 0.171 | 0.001 | 0.000 | 0.997 | 0.292 |  |
| *Oulophyllia* | 0.000 | 0.002 | 0.192 | 0.000 | 0.001 | 0.998 | 0.887 |  |
| *Alveopora* | 0.000 | 0.002 | 0.192 | 0.000 | 0.001 | 0.999 | 0.001 | *** |
| *Fimbriaphyllia* | 0.000 | 0.002 | 0.192 | 0.000 | 0.001 | 0.999 | 0.651 |  |
| *Herpolitha* | 0.000 | 0.002 | 0.192 | 0.000 | 0.001 | 1.000 | 0.001 | *** |
| *Sandalolitha* | 0.000 | 0.002 | 0.171 | 0.001 | 0.000 | 1.000 | 0.908 |  |
| *Bernardpora* | 0.000 | 0.000 | NaN | 0.000 | 0.000 | 1.000 | NA |  |
| *Coelastrea* | 0.000 | 0.000 | NaN | 0.000 | 0.000 | 1.000 | NA |  |
| *Coeloseris* | 0.000 | 0.000 | NaN | 0.000 | 0.000 | 1.000 | NA |  |
| *Ctenactis* | 0.000 | 0.000 | NaN | 0.000 | 0.000 | 1.000 | NA |  |
| *Gardineroseris* | 0.000 | 0.000 | NaN | 0.000 | 0.000 | 1.000 | NA |  |
| *Heliopora* | 0.000 | 0.000 | NaN | 0.000 | 0.000 | 1.000 | NA |  |
|  |  |  |  |  |  |  |  |  |
| Pre vs Post |  |  |  |  |  |  |  |  |
|  | **average** | **sd** | **ratio** | **ava** | **avb** | **cumsum** | ***p*** |  |
| *Acropora* | 0.116 | 0.105 | 1.112 | 0.192 | 0.187 | 0.165 | 0.084 | . |
| *Porites* | 0.072 | 0.060 | 1.199 | 0.138 | 0.116 | 0.266 | 0.114 |  |
| *Merulina* | 0.044 | 0.081 | 0.543 | 0.073 | 0.046 | 0.328 | 0.464 |  |
| *Echinophyllia* | 0.043 | 0.055 | 0.780 | 0.052 | 0.058 | 0.389 | 0.264 |  |
| *Dipsastraea* | 0.037 | 0.035 | 1.063 | 0.059 | 0.076 | 0.441 | 0.241 |  |
| *Mycedium* | 0.032 | 0.052 | 0.613 | 0.026 | 0.049 | 0.486 | 0.525 |  |
| *Echinopora* | 0.030 | 0.051 | 0.584 | 0.031 | 0.048 | 0.528 | 0.623 |  |
| *Pocillopora* | 0.030 | 0.029 | 1.015 | 0.047 | 0.041 | 0.571 | 0.865 |  |
| *Platygyra* | 0.028 | 0.025 | 1.106 | 0.048 | 0.054 | 0.610 | 0.207 |  |
| *Favites* | 0.027 | 0.031 | 0.855 | 0.045 | 0.034 | 0.648 | 0.166 |  |
| *Millepora* | 0.025 | 0.056 | 0.444 | 0.022 | 0.034 | 0.683 | 0.463 |  |
| *Montipora* | 0.020 | 0.031 | 0.642 | 0.036 | 0.013 | 0.712 | 0.071 | . |
| *Pectinia* | 0.020 | 0.041 | 0.491 | 0.016 | 0.031 | 0.740 | 0.844 |  |
| *Cyphastrea* | 0.019 | 0.023 | 0.811 | 0.030 | 0.022 | 0.767 | 0.101 |  |
| *Goniastrea* | 0.018 | 0.022 | 0.799 | 0.025 | 0.023 | 0.792 | 0.537 |  |
| *Lobophyllia* | 0.016 | 0.023 | 0.688 | 0.010 | 0.029 | 0.815 | 0.685 |  |
| *Psammocora* | 0.014 | 0.025 | 0.543 | 0.012 | 0.019 | 0.835 | 0.122 |  |
| *Turbinaria* | 0.013 | 0.023 | 0.592 | 0.020 | 0.013 | 0.854 | 0.665 |  |
| *Astreopora* | 0.013 | 0.023 | 0.537 | 0.013 | 0.016 | 0.871 | 0.540 |  |
| *Galaxea* | 0.011 | 0.016 | 0.726 | 0.019 | 0.008 | 0.887 | 0.074 | . |
| *Hydnophora* | 0.010 | 0.015 | 0.636 | 0.013 | 0.010 | 0.901 | 0.477 |  |
| *Stylocoeniella* | 0.009 | 0.029 | 0.315 | 0.018 | 0.000 | 0.914 | 0.371 |  |
| *Pachyseris* | 0.008 | 0.012 | 0.668 | 0.006 | 0.014 | 0.926 | 0.940 |  |
| *Pavona* | 0.007 | 0.024 | 0.283 | 0.006 | 0.008 | 0.935 | 0.382 |  |
| *Astrea* | 0.005 | 0.008 | 0.606 | 0.005 | 0.007 | 0.943 | 0.749 |  |
| *Leptastrea* | 0.004 | 0.011 | 0.420 | 0.002 | 0.007 | 0.949 | 0.214 |  |
| *Stylophora* | 0.004 | 0.011 | 0.360 | 0.001 | 0.007 | 0.955 | 0.440 |  |
| *Plesiastrea* | 0.004 | 0.007 | 0.508 | 0.004 | 0.004 | 0.960 | 0.962 |  |
| *Lithophyllon* | 0.003 | 0.010 | 0.322 | 0.000 | 0.006 | 0.964 | 0.475 |  |
| *Cycloseris* | 0.003 | 0.012 | 0.250 | 0.001 | 0.005 | 0.968 | 0.738 |  |
| *Oxyopora* | 0.003 | 0.010 | 0.313 | 0.006 | 0.000 | 0.973 | 0.001 | *** |
| *Isopora* | 0.003 | 0.011 | 0.240 | 0.004 | 0.001 | 0.976 | 0.548 |  |
| *Leptoseris* | 0.003 | 0.005 | 0.466 | 0.005 | 0.001 | 0.980 | 0.893 |  |
| *Diploastrea* | 0.002 | 0.006 | 0.422 | 0.003 | 0.002 | 0.983 | 0.385 |  |
| *Goniopora* | 0.002 | 0.009 | 0.212 | 0.001 | 0.003 | 0.986 | 0.553 |  |
| *Fungia* | 0.002 | 0.011 | 0.171 | 0.004 | 0.000 | 0.989 | 0.659 |  |
| *Sandalolitha* | 0.001 | 0.005 | 0.283 | 0.001 | 0.002 | 0.991 | 0.081 | . |
| *Caulastraea* | 0.001 | 0.006 | 0.223 | 0.000 | 0.002 | 0.992 | 0.498 |  |
| *Seriatopora* | 0.001 | 0.006 | 0.213 | 0.002 | 0.000 | 0.994 | 0.772 |  |
| *Oulophyllia* | 0.001 | 0.003 | 0.300 | 0.000 | 0.002 | 0.996 | 0.360 |  |
| *Ctenactis* | 0.001 | 0.005 | 0.171 | 0.000 | 0.002 | 0.997 | 0.001 | *** |
| *Leptoria* | 0.001 | 0.003 | 0.246 | 0.002 | 0.000 | 0.998 | 0.001 | *** |
| *Fimbriaphyllia* | 0.001 | 0.004 | 0.171 | 0.000 | 0.001 | 0.999 | 0.490 |  |
| *Oulastrea* | 0.000 | 0.002 | 0.171 | 0.001 | 0.000 | 0.999 | 0.001 | *** |
| *Coelastrea* | 0.000 | 0.002 | 0.171 | 0.000 | 0.001 | 1.000 | 0.001 | *** |
| *Acanthastrea* | 0.000 | 0.000 | NaN | 0.000 | 0.000 | 1.000 | NA |  |
| *Alveopora* | 0.000 | 0.000 | NaN | 0.000 | 0.000 | 1.000 | NA |  |
| *Bernardpora* | 0.000 | 0.000 | NaN | 0.000 | 0.000 | 1.000 | NA |  |
| *Blastomussa* | 0.000 | 0.000 | NaN | 0.000 | 0.000 | 1.000 | NA |  |
| *Coeloseris* | 0.000 | 0.000 | NaN | 0.000 | 0.000 | 1.000 | NA |  |
| *Gardineroseris* | 0.000 | 0.000 | NaN | 0.000 | 0.000 | 1.000 | NA |  |
| *Heliopora* | 0.000 | 0.000 | NaN | 0.000 | 0.000 | 1.000 | NA |  |
| *Herpolitha* | 0.000 | 0.000 | NaN | 0.000 | 0.000 | 1.000 | NA |  |
| *Plerogyra* | 0.000 | 0.000 | NaN | 0.000 | 0.000 | 1.000 | NA |  |
| *Podabacia* | 0.000 | 0.000 | NaN | 0.000 | 0.000 | 1.000 | NA |  |
|  |  |  |  |  |  |  |  |  |
| Intra vs. Post |  |  |  |  |  |  |  |  |
|  | **average** | **sd** | **ratio** | **ava** | **avb** | **cumsum** | ***p*** |  |
| *Acropora* | 0.101 | 0.093 | 1.087 | 0.128 | 0.187 | 0.146 | 0.808 |  |
| *Porites* | 0.061 | 0.049 | 1.252 | 0.121 | 0.116 | 0.234 | 0.908 |  |
| *Echinophyllia* | 0.041 | 0.053 | 0.760 | 0.047 | 0.058 | 0.292 | 0.507 |  |
| *Dipsastraea* | 0.039 | 0.033 | 1.191 | 0.081 | 0.076 | 0.348 | 0.074 | . |
| *Mycedium* | 0.037 | 0.051 | 0.723 | 0.043 | 0.049 | 0.401 | 0.188 |  |
| *Pocillopora* | 0.035 | 0.043 | 0.815 | 0.056 | 0.041 | 0.451 | 0.348 |  |
| *Echinopora* | 0.034 | 0.049 | 0.687 | 0.045 | 0.048 | 0.500 | 0.288 |  |
| *Merulina* | 0.033 | 0.028 | 1.174 | 0.060 | 0.046 | 0.548 | 0.721 |  |
| *Pectinia* | 0.030 | 0.049 | 0.609 | 0.043 | 0.031 | 0.591 | 0.079 | . |
| *Pachyseris* | 0.028 | 0.090 | 0.308 | 0.050 | 0.014 | 0.631 | 0.022 | * |
| *Platygyra* | 0.026 | 0.022 | 1.191 | 0.044 | 0.054 | 0.669 | 0.510 |  |
| *Millepora* | 0.025 | 0.057 | 0.448 | 0.023 | 0.034 | 0.706 | 0.446 |  |
| *Favites* | 0.022 | 0.023 | 0.990 | 0.036 | 0.034 | 0.738 | 0.756 |  |
| *Lobophyllia* | 0.021 | 0.024 | 0.862 | 0.028 | 0.029 | 0.768 | 0.011 | * |
| *Goniastrea* | 0.018 | 0.021 | 0.829 | 0.026 | 0.023 | 0.794 | 0.526 |  |
| *Cyphastrea* | 0.014 | 0.017 | 0.849 | 0.016 | 0.022 | 0.814 | 0.883 |  |
| *Turbinaria* | 0.014 | 0.017 | 0.815 | 0.022 | 0.013 | 0.834 | 0.652 |  |
| *Astreopora* | 0.013 | 0.017 | 0.748 | 0.016 | 0.016 | 0.852 | 0.503 |  |
| *Psammocora* | 0.011 | 0.022 | 0.521 | 0.006 | 0.019 | 0.868 | 0.526 |  |
| *Montipora* | 0.011 | 0.014 | 0.791 | 0.014 | 0.013 | 0.884 | 0.993 |  |
| *Hydnophora* | 0.009 | 0.014 | 0.608 | 0.011 | 0.010 | 0.897 | 0.682 |  |
| *Galaxea* | 0.007 | 0.011 | 0.663 | 0.009 | 0.008 | 0.907 | 0.945 |  |
| *Plesiastrea* | 0.006 | 0.011 | 0.558 | 0.010 | 0.004 | 0.916 | 0.143 |  |
| *Astrea* | 0.006 | 0.009 | 0.655 | 0.008 | 0.007 | 0.925 | 0.254 |  |
| *Pavona* | 0.005 | 0.023 | 0.236 | 0.003 | 0.008 | 0.933 | 0.600 |  |
| *Cycloseris* | 0.005 | 0.014 | 0.394 | 0.006 | 0.005 | 0.941 | 0.102 |  |
| *Stylophora* | 0.005 | 0.010 | 0.456 | 0.004 | 0.007 | 0.948 | 0.157 |  |
| *Lithophyllon* | 0.004 | 0.011 | 0.409 | 0.003 | 0.006 | 0.954 | 0.074 | . |
| *Leptoseris* | 0.004 | 0.013 | 0.329 | 0.008 | 0.001 | 0.960 | 0.437 |  |
| *Leptastrea* | 0.004 | 0.010 | 0.414 | 0.002 | 0.007 | 0.966 | 0.332 |  |
| *Goniopora* | 0.003 | 0.013 | 0.258 | 0.004 | 0.003 | 0.971 | 0.313 |  |
| *Stylocoeniella* | 0.003 | 0.006 | 0.476 | 0.006 | 0.000 | 0.976 | 0.977 |  |
| *Plerogyra* | 0.002 | 0.012 | 0.192 | 0.004 | 0.000 | 0.979 | 0.001 | *** |
| *Diploastrea* | 0.002 | 0.005 | 0.360 | 0.002 | 0.002 | 0.981 | 0.841 |  |
| *Caulastraea* | 0.002 | 0.006 | 0.282 | 0.001 | 0.002 | 0.984 | 0.142 |  |
| *Isopora* | 0.001 | 0.005 | 0.280 | 0.002 | 0.001 | 0.986 | 0.738 |  |
| *Oulophyllia* | 0.001 | 0.004 | 0.357 | 0.001 | 0.002 | 0.988 | 0.126 |  |
| *Seriatopora* | 0.001 | 0.004 | 0.341 | 0.003 | 0.000 | 0.989 | 0.682 |  |
| *Sandalolitha* | 0.001 | 0.005 | 0.241 | 0.000 | 0.002 | 0.991 | 0.394 |  |
| *Blastomussa* | 0.001 | 0.006 | 0.192 | 0.002 | 0.000 | 0.993 | 0.001 | *** |
| *Fimbriaphyllia* | 0.001 | 0.004 | 0.240 | 0.001 | 0.001 | 0.994 | 0.188 |  |
| *Podabacia* | 0.001 | 0.005 | 0.192 | 0.002 | 0.000 | 0.995 | 0.001 | *** |
| *Ctenactis* | 0.001 | 0.005 | 0.171 | 0.000 | 0.002 | 0.997 | 0.289 |  |
| *Fungia* | 0.001 | 0.003 | 0.277 | 0.002 | 0.000 | 0.998 | 0.667 |  |
| *Acanthastrea* | 0.000 | 0.002 | 0.192 | 0.001 | 0.000 | 0.998 | 0.001 | *** |
| *Coelastrea* | 0.000 | 0.002 | 0.171 | 0.000 | 0.001 | 0.999 | 0.289 |  |
| *Alveopora* | 0.000 | 0.002 | 0.192 | 0.001 | 0.000 | 1.000 | 0.001 | *** |
| *Herpolitha* | 0.000 | 0.002 | 0.192 | 0.001 | 0.000 | 1.000 | 0.001 | *** |
| *Bernardpora* | 0.000 | 0.000 | NaN | 0.000 | 0.000 | 1.000 | NA |  |
| *Coeloseris* | 0.000 | 0.000 | NaN | 0.000 | 0.000 | 1.000 | NA |  |
| *Gardineroseris* | 0.000 | 0.000 | NaN | 0.000 | 0.000 | 1.000 | NA |  |
| *Heliopora* | 0.000 | 0.000 | NaN | 0.000 | 0.000 | 1.000 | NA |  |
| *Leptoria* | 0.000 | 0.000 | NaN | 0.000 | 0.000 | 1.000 | NA |  |
| *Oulastrea* | 0.000 | 0.000 | NaN | 0.000 | 0.000 | 1.000 | NA |  |
| *Oxyopora* | 0.000 | 0.000 | NaN | 0.000 | 0.000 | 1.000 | NA |  |

**Online resource 2c** SIMPER results for changes in fish community composition by depth zone. List is capped at 98.0 cumulative sum

| **Depth: Shallow** | |  | |  | |  | |  | |  | |  | |  | |  | |
| --- | --- | --- | --- | --- | --- | --- | --- | --- | --- | --- | --- | --- | --- | --- | --- | --- | --- |
|  | **average** | | | **sd** | | **ratio** | | **ava** | | **avb** | | **cumsum** | | ***p*** | |  | |
| *Pomachromis richardsoni* | | 0.124 | | 0.122 | | 1.019 | | 45.257 | | 57.743 | | 0.163 | | 0.450 | |  | |
| *Pomacentrus moluccensis* | | 0.069 | | 0.120 | | 0.573 | | 42.857 | | 20.400 | | 0.254 | | 0.436 | |  | |
| *Pomacentrus philippinus* | | 0.056 | | 0.058 | | 0.982 | | 17.457 | | 22.543 | | 0.329 | | 0.540 | |  | |
| *Abudefduf sexfasciatus* | | 0.036 | | 0.081 | | 0.450 | | 9.886 | | 13.114 | | 0.376 | | 0.058 | |  | |
| *Chrysiptera rex* | | 0.032 | | 0.031 | | 1.050 | | 18.429 | | 13.971 | | 0.419 | | 0.238 | |  | |
| *Acanthurus nigrofuscus* | | 0.028 | | 0.057 | | 0.496 | | 7.171 | | 16.029 | | 0.456 | | 0.160 | |  | |
| *Plectroglyphidodon fasciolatus* | | 0.024 | | 0.025 | | 0.966 | | 8.857 | | 8.229 | | 0.488 | | 0.622 | |  | |
| *Pomacentrus lepidogenys* | | 0.023 | | 0.038 | | 0.602 | | 8.457 | | 8.800 | | 0.518 | | 0.860 | |  | |
| *Chromis sp* | | 0.020 | | 0.038 | | 0.537 | | 5.371 | | 4.057 | | 0.545 | | 0.810 | |  | |
| *Ctenochaetus striatus* | | 0.019 | | 0.020 | | 0.972 | | 6.600 | | 7.800 | | 0.570 | | 0.679 | |  | |
| *Thalassoma amblycephalum* | | 0.019 | | 0.031 | | 0.600 | | 5.514 | | 4.914 | | 0.594 | | 0.362 | |  | |
| *Chromis chrysura* | | 0.018 | | 0.039 | | 0.452 | | 5.857 | | 4.657 | | 0.618 | | 0.915 | |  | |
| *Acanthurus lineatus* | | 0.017 | | 0.023 | | 0.742 | | 3.657 | | 6.429 | | 0.640 | | 0.254 | |  | |
| *Amblyglyphidodon curacao* | | 0.014 | | 0.025 | | 0.577 | | 3.314 | | 5.200 | | 0.659 | | 0.470 | |  | |
| *Thalassoma quinquevittatum* | | 0.014 | | 0.022 | | 0.626 | | 4.400 | | 2.971 | | 0.678 | | 0.676 | |  | |
| *Pycnochromis vanderbilti* | | 0.014 | | 0.041 | | 0.338 | | 4.486 | | 2.714 | | 0.696 | | 0.859 | |  | |
| *Pycnochromis margaritifer* | | 0.013 | | 0.027 | | 0.470 | | 1.400 | | 6.886 | | 0.713 | | 0.185 | |  | |
| *Chromis viridis* | | 0.012 | | 0.047 | | 0.251 | | 9.771 | | 2.857 | | 0.728 | | 0.801 | |  | |
| *Scolopsis lineata* | | 0.008 | | 0.027 | | 0.297 | | 1.943 | | 1.600 | | 0.739 | | 0.384 | |  | |
| *Chlorurus spilurus* | | 0.007 | | 0.009 | | 0.772 | | 2.486 | | 2.400 | | 0.748 | | 0.712 | |  | |
| *Ctenochaetus binotatus* | | 0.006 | | 0.009 | | 0.722 | | 2.257 | | 1.657 | | 0.756 | | 0.335 | |  | |
| *Siganus argenteus* | | 0.005 | | 0.020 | | 0.255 | | 0.000 | | 3.457 | | 0.763 | | 0.183 | |  | |
| *Abudefduf vaigiensis* | | 0.005 | | 0.010 | | 0.470 | | 1.171 | | 1.229 | | 0.769 | | 0.754 | |  | |
| *Thalassoma lutescens* | | 0.005 | | 0.005 | | 0.981 | | 2.314 | | 1.914 | | 0.775 | | 0.282 | |  | |
| *Pterocaesio tile* | | 0.005 | | 0.027 | | 0.170 | | 5.714 | | 0.000 | | 0.782 | | 0.734 | |  | |
| *Chromis yamakawai* | | 0.004 | | 0.017 | | 0.249 | | 0.086 | | 2.229 | | 0.787 | | 0.187 | |  | |
| *Pterocaesio digramma* | | 0.004 | | 0.023 | | 0.169 | | 0.000 | | 3.000 | | 0.792 | | 0.425 | |  | |
| *Chaetodon lunulatus* | | 0.004 | | 0.004 | | 1.062 | | 2.000 | | 1.229 | | 0.797 | | 0.661 | |  | |
| *Chrysiptera cyanea* | | 0.004 | | 0.010 | | 0.374 | | 1.229 | | 1.229 | | 0.802 | | 0.431 | |  | |
| *Parupeneus multifasciatus* | | 0.003 | | 0.009 | | 0.387 | | 1.514 | | 0.629 | | 0.807 | | 0.817 | |  | |
| *Pomacentrus vaiuli* | | 0.003 | | 0.007 | | 0.470 | | 0.714 | | 1.200 | | 0.811 | | 0.415 | |  | |
| *Stegastes lacrymatus* | | 0.003 | | 0.005 | | 0.664 | | 1.057 | | 1.571 | | 0.815 | | 0.419 | |  | |
| *Plectroglyphidodon dickii* | | 0.003 | | 0.005 | | 0.637 | | 1.000 | | 0.743 | | 0.820 | | 0.637 | |  | |
| *Chromis atripectoralis* | | 0.003 | | 0.015 | | 0.200 | | 0.029 | | 1.914 | | 0.824 | | 0.287 | |  | |
| *Halichoeres melanochir* | | 0.003 | | 0.005 | | 0.661 | | 0.771 | | 0.743 | | 0.828 | | 0.846 | |  | |
| *Dascyllus trimaculatus* | | 0.003 | | 0.007 | | 0.423 | | 0.914 | | 1.000 | | 0.832 | | 0.898 | |  | |
| *Pomacentrus bankanensis* | | 0.003 | | 0.004 | | 0.692 | | 0.914 | | 0.514 | | 0.835 | | 0.337 | |  | |
| *Neoglyphidodon melas* | | 0.003 | | 0.005 | | 0.525 | | 1.200 | | 0.543 | | 0.839 | | 0.767 | |  | |
| *Chrysiptera caeruleolineata* | | 0.002 | | 0.008 | | 0.299 | | 1.000 | | 0.000 | | 0.842 | | 0.232 | |  | |
| *Labroides dimidiatus* | | 0.002 | | 0.003 | | 0.840 | | 0.943 | | 0.800 | | 0.845 | | 0.379 | |  | |
| *Pomacentrus amboinensis* | | 0.002 | | 0.008 | | 0.285 | | 1.800 | | 0.657 | | 0.848 | | 0.857 | |  | |
| *Mulloidichthys vanicolensis* | | 0.002 | | 0.013 | | 0.173 | | 0.000 | | 1.200 | | 0.851 | | 0.315 | |  | |
| *Pomacentrus alexanderae* | | 0.002 | | 0.007 | | 0.323 | | 1.571 | | 0.371 | | 0.854 | | 0.687 | |  | |
| *Siganus guttatus* | | 0.002 | | 0.013 | | 0.167 | | 1.143 | | 0.000 | | 0.857 | | 0.704 | |  | |
| *Chaetodon vagabundus* | | 0.002 | | 0.002 | | 0.889 | | 0.657 | | 0.743 | | 0.860 | | 0.390 | |  | |
| *Amphiprion frenatus* | | 0.002 | | 0.006 | | 0.341 | | 0.657 | | 0.257 | | 0.863 | | 0.746 | |  | |
| *Zanclus cornutus* | | 0.002 | | 0.002 | | 1.052 | | 0.629 | | 1.143 | | 0.865 | | 0.019 | | * | |
| *Centropyge vroliki* | | 0.002 | | 0.003 | | 0.705 | | 0.714 | | 0.543 | | 0.868 | | 0.662 | |  | |
| *Siganus spinus* | | 0.002 | | 0.010 | | 0.206 | | 1.429 | | 0.286 | | 0.871 | | 0.718 | |  | |
| *Kyphosus vaigiensis* | | 0.002 | | 0.008 | | 0.268 | | 0.457 | | 0.400 | | 0.873 | | 0.640 | |  | |
| *Naso unicornis* | | 0.002 | | 0.008 | | 0.252 | | 0.686 | | 0.114 | | 0.876 | | 0.621 | |  | |
| *Neoglyphidodon nigroris* | | 0.002 | | 0.003 | | 0.549 | | 0.686 | | 0.343 | | 0.879 | | 0.592 | |  | |
| *Naso lituratus* | | 0.002 | | 0.003 | | 0.573 | | 0.657 | | 0.343 | | 0.881 | | 0.319 | |  | |
| *Zebrasoma scopas* | | 0.002 | | 0.003 | | 0.668 | | 0.514 | | 0.771 | | 0.884 | | 0.514 | |  | |
| *Rastrelliger kanagurta* | | 0.002 | | 0.012 | | 0.162 | | 0.000 | | 0.571 | | 0.886 | | 0.208 | |  | |
| *Acanthurus triostegus* | | 0.002 | | 0.006 | | 0.328 | | 0.057 | | 0.743 | | 0.888 | | 0.044 | | * | |
| *Neopomacentrus cyanomos* | | 0.002 | | 0.011 | | 0.168 | | 1.000 | | 0.000 | | 0.891 | | 0.688 | |  | |
| *Gomphosus varius* | | 0.002 | | 0.002 | | 0.813 | | 0.571 | | 0.686 | | 0.893 | | 0.559 | |  | |
| *Pomacentrus burroughi* | | 0.002 | | 0.003 | | 0.625 | | 0.571 | | 0.543 | | 0.895 | | 0.829 | |  | |
| *Thalassoma hardwicke* | | 0.002 | | 0.003 | | 0.616 | | 0.771 | | 0.543 | | 0.898 | | 0.771 | |  | |
| *Hemigymnus fasciatus* | | 0.002 | | 0.002 | | 0.864 | | 0.686 | | 0.514 | | 0.900 | | 0.453 | |  | |
| *Myripristis murdjan* | | 0.002 | | 0.006 | | 0.305 | | 0.400 | | 0.371 | | 0.902 | | 0.745 | |  | |
| *Plectroglyphidodon fasciolatus* | | 0.002 | | 0.004 | | 0.428 | | 0.314 | | 0.457 | | 0.904 | | 0.500 | |  | |
| *Plectroglyphidodon obreptus* | | 0.002 | | 0.005 | | 0.345 | | 0.314 | | 0.400 | | 0.907 | | 0.606 | |  | |
| *Acanthurus nigricans* | | 0.002 | | 0.005 | | 0.347 | | 0.543 | | 0.114 | | 0.909 | | 0.365 | |  | |
| *Oxymonacanthus longirostris* | | 0.002 | | 0.004 | | 0.388 | | 0.800 | | 0.229 | | 0.911 | | 0.797 | |  | |
| *Chaetodon citrinellus* | | 0.002 | | 0.003 | | 0.578 | | 0.314 | | 0.486 | | 0.913 | | 0.559 | |  | |
| *Siganus virgatus* | | 0.002 | | 0.004 | | 0.341 | | 0.029 | | 0.600 | | 0.915 | | 0.028 | | * | |
| *Pomacentrus chrysurus* | | 0.001 | | 0.004 | | 0.347 | | 0.800 | | 0.171 | | 0.917 | | 0.747 | |  | |
| *Amphiprion clarkii* | | 0.001 | | 0.003 | | 0.446 | | 0.571 | | 0.371 | | 0.919 | | 0.783 | |  | |
| *Dascyllus aruanus* | | 0.001 | | 0.004 | | 0.388 | | 1.143 | | 0.314 | | 0.921 | | 0.676 | |  | |
| *Lutjanus monostigma* | | 0.001 | | 0.003 | | 0.451 | | 0.229 | | 0.371 | | 0.922 | | 0.299 | |  | |
| *Labrichthys unilineatus* | | 0.001 | | 0.003 | | 0.422 | | 0.914 | | 0.229 | | 0.924 | | 0.575 | |  | |
| *Dascyllus reticulatus* | | 0.001 | | 0.003 | | 0.397 | | 0.371 | | 0.629 | | 0.926 | | 0.333 | |  | |
| *Chaetodon auripes* | | 0.001 | | 0.002 | | 0.556 | | 0.286 | | 0.400 | | 0.928 | | 0.208 | |  | |
| *Chaetodon plebeius* | | 0.001 | | 0.002 | | 0.575 | | 0.543 | | 0.114 | | 0.929 | | 0.079 | |  | |
| *Kyphosus cinerascens* | | 0.001 | | 0.005 | | 0.215 | | 0.086 | | 0.600 | | 0.931 | | 0.524 | |  | |
| *Chrysiptera brownriggii* | | 0.001 | | 0.004 | | 0.283 | | 0.000 | | 0.457 | | 0.932 | | 0.068 | |  | |
| *Amblyglyphidodon leucogaster* | | 0.001 | | 0.003 | | 0.389 | | 0.314 | | 0.257 | | 0.934 | | 0.906 | |  | |
| *Parioglossus philippinus* | | 0.001 | | 0.005 | | 0.214 | | 0.429 | | 0.000 | | 0.935 | | 0.592 | |  | |
| *Thalassoma lunare* | | 0.001 | | 0.002 | | 0.617 | | 0.400 | | 0.314 | | 0.936 | | 0.816 | |  | |
| *Chaetodon rafflesi* | | 0.001 | | 0.002 | | 0.509 | | 0.143 | | 0.371 | | 0.937 | | 0.174 | |  | |
| *Canthigaster valentini* | | 0.001 | | 0.002 | | 0.482 | | 0.257 | | 0.229 | | 0.939 | | 0.433 | |  | |
| *Halichoeres marginatus* | | 0.001 | | 0.002 | | 0.594 | | 0.286 | | 0.286 | | 0.940 | | 0.855 | |  | |
| *Scarus forsteni* | | 0.001 | | 0.002 | | 0.567 | | 0.229 | | 0.371 | | 0.941 | | 0.502 | |  | |
| *Scarus sp* | | 0.001 | | 0.003 | | 0.327 | | 0.314 | | 0.143 | | 0.942 | | 0.753 | |  | |
| *Mirolabrichthys tuka* | | 0.001 | | 0.004 | | 0.226 | | 0.286 | | 0.257 | | 0.944 | | 0.794 | |  | |
| *Zebrasoma velifer* | | 0.001 | | 0.002 | | 0.507 | | 0.143 | | 0.429 | | 0.945 | | 0.108 | |  | |
| *Paracirrhites forsteri* | | 0.001 | | 0.001 | | 0.604 | | 0.200 | | 0.286 | | 0.946 | | 0.778 | |  | |
| *Scarus niger* | | 0.001 | | 0.002 | | 0.552 | | 0.143 | | 0.314 | | 0.947 | | 0.170 | |  | |
| *Chaetodon auriga* | | 0.001 | | 0.002 | | 0.549 | | 0.143 | | 0.286 | | 0.948 | | 0.374 | |  | |
| *Epibulus insidiator* | | 0.001 | | 0.002 | | 0.434 | | 0.343 | | 0.086 | | 0.949 | | 0.252 | |  | |
| *Parupeneus ciliatus* | | 0.001 | | 0.003 | | 0.273 | | 0.343 | | 0.057 | | 0.950 | | 0.781 | |  | |
| *Forcipiger flavissimus* | | 0.001 | | 0.002 | | 0.523 | | 0.229 | | 0.171 | | 0.951 | | 0.909 | |  | |
| *Girella mezina* | | 0.001 | | 0.002 | | 0.364 | | 0.171 | | 0.171 | | 0.952 | | 0.737 | |  | |
| *Chaetodon argentatus* | | 0.001 | | 0.004 | | 0.219 | | 0.029 | | 0.229 | | 0.953 | | 0.175 | |  | |
| *Scarus altipinnis* | | 0.001 | | 0.005 | | 0.164 | | 0.286 | | 0.000 | | 0.954 | | 0.674 | |  | |
| *Neoniphon sammara* | | 0.001 | | 0.002 | | 0.448 | | 0.286 | | 0.057 | | 0.955 | | 0.270 | |  | |
| *Cephalopholis urodeta* | | 0.001 | | 0.002 | | 0.474 | | 0.257 | | 0.171 | | 0.956 | | 0.576 | |  | |
| *Cheiloprion labiatus* | | 0.001 | | 0.002 | | 0.472 | | 0.371 | | 0.229 | | 0.957 | | 0.596 | |  | |
| *Pempheris sp* | | 0.001 | | 0.002 | | 0.453 | | 0.257 | | 0.057 | | 0.958 | | 0.213 | |  | |
| *Anampses caeruleopunctatus* | | 0.001 | | 0.002 | | 0.406 | | 0.143 | | 0.171 | | 0.959 | | 0.639 | |  | |
| *Cantherhines dumerilii* | | 0.001 | | 0.002 | | 0.434 | | 0.143 | | 0.200 | | 0.960 | | 0.755 | |  | |
| *Paracirrhites arcatus* | | 0.001 | | 0.001 | | 0.517 | | 0.143 | | 0.229 | | 0.961 | | 0.652 | |  | |
| *Halichoeres melanurus* | | 0.001 | | 0.001 | | 0.453 | | 0.229 | | 0.200 | | 0.962 | | 0.779 | |  | |
| *Balistapus undulatus* | | 0.001 | | 0.001 | | 0.416 | | 0.171 | | 0.143 | | 0.963 | | 0.773 | |  | |
| *Centropyge ferrugata* | | 0.001 | | 0.002 | | 0.342 | | 0.171 | | 0.171 | | 0.964 | | 0.674 | |  | |
| *Stethojulis bandanensis* | | 0.001 | | 0.001 | | 0.393 | | 0.086 | | 0.143 | | 0.964 | | 0.427 | |  | |
| *Coris aygula* | | 0.001 | | 0.001 | | 0.414 | | 0.086 | | 0.171 | | 0.965 | | 0.348 | |  | |
| *Chaetodon ephippium* | | 0.001 | | 0.001 | | 0.426 | | 0.086 | | 0.171 | | 0.966 | | 0.495 | |  | |
| *Cheilinus trilobatus* | | 0.001 | | 0.002 | | 0.218 | | 0.171 | | 0.057 | | 0.966 | | 0.721 | |  | |
| *Arothron nigropunctatus* | | 0.001 | | 0.001 | | 0.441 | | 0.171 | | 0.086 | | 0.967 | | 0.742 | |  | |
| *Ostracion cubicum* | | 0.001 | | 0.001 | | 0.478 | | 0.086 | | 0.143 | | 0.968 | | 0.374 | |  | |
| *Cantherhines pardalis* | | 0.001 | | 0.001 | | 0.419 | | 0.171 | | 0.086 | | 0.968 | | 0.690 | |  | |
| *Acanthurus japonicus* | | 0.000 | | 0.001 | | 0.421 | | 0.000 | | 0.229 | | 0.969 | | 0.010 | | * | |
| *Chaetodon kleinii* | | 0.000 | | 0.002 | | 0.315 | | 0.171 | | 0.086 | | 0.970 | | 0.761 | |  | |
| *Hemigymnus melapterus* | | 0.000 | | 0.001 | | 0.494 | | 0.171 | | 0.200 | | 0.970 | | 0.193 | |  | |
| *Girella leonina* | | 0.000 | | 0.003 | | 0.164 | | 0.000 | | 0.171 | | 0.971 | | 0.249 | |  | |
| *Pervagor janthinosoma* | | 0.000 | | 0.001 | | 0.354 | | 0.143 | | 0.057 | | 0.972 | | 0.621 | |  | |
| *Siganus unimaculatus* | | 0.000 | | 0.001 | | 0.355 | | 0.257 | | 0.114 | | 0.972 | | 0.792 | |  | |
| *Scarus rivulatus* | | 0.000 | | 0.001 | | 0.354 | | 0.000 | | 0.200 | | 0.973 | | 0.022 | | * | |
| *Chaetodon trifascialis* | | 0.000 | | 0.001 | | 0.404 | | 0.229 | | 0.057 | | 0.973 | | 0.642 | |  | |
| *Acanthurus gahhm* | | 0.000 | | 0.002 | | 0.259 | | 0.029 | | 0.171 | | 0.974 | | 0.235 | |  | |
| *Pycnochromis atripes* | | 0.000 | | 0.001 | | 0.283 | | 0.029 | | 0.257 | | 0.974 | | 0.255 | |  | |
| *Acanthurus dussumieri* | | 0.000 | | 0.001 | | 0.276 | | 0.029 | | 0.200 | | 0.975 | | 0.189 | |  | |
| *Heniochus singularis* | | 0.000 | | 0.001 | | 0.320 | | 0.057 | | 0.114 | | 0.976 | | 0.474 | |  | |
| *Azurina lepidolepis* | | 0.000 | | 0.001 | | 0.363 | | 0.114 | | 0.086 | | 0.976 | | 0.854 | |  | |
| *Parupeneus cyclostomus* | | 0.000 | | 0.001 | | 0.415 | | 0.057 | | 0.143 | | 0.977 | | 0.388 | |  | |
| *Synodus binotatus* | | 0.000 | | 0.001 | | 0.367 | | 0.086 | | 0.057 | | 0.977 | | 0.785 | |  | |
| *Myripristis violacea* | | 0.000 | | 0.002 | | 0.181 | | 0.114 | | 0.029 | | 0.977 | | 0.703 | |  | |
| *Anampses twistii* | | 0.000 | | 0.001 | | 0.452 | | 0.143 | | 0.114 | | 0.978 | | 0.418 | |  | |
| *Sargocentron diadema* | | 0.000 | | 0.001 | | 0.311 | | 0.029 | | 0.171 | | 0.978 | | 0.190 | |  | |
| *Pseudocheilinus hexataenia* | | 0.000 | | 0.001 | | 0.395 | | 0.200 | | 0.086 | | 0.979 | | 0.782 | |  | |
| *Sufflamen chrysopterum* | | 0.000 | | 0.001 | | 0.369 | | 0.086 | | 0.057 | | 0.979 | | 0.776 | |  | |
| *Chromis xanthura* | | 0.000 | | 0.001 | | 0.233 | | 0.114 | | 0.086 | | 0.980 | | 0.782 | |  | |
|  | |  | |  | |  | |  | |  | |  | |  | |  | |
| **Depth: Deep** | |  | |  | |  | |  | |  | |  | |  | |  | |
|  | **average** | | **sd** | | **ratio** | | **ava** | | **avb** | | **cumsum** | | **p** | |  | |
| *Pomachromis richardsoni* | | 0.070 | | 0.113 | | 0.620 | | 2.857 | | 38.829 | | 0.085 | | 0.007 | | ** | |
| *Pomacentrus philippinus* | | 0.069 | | 0.071 | | 0.969 | | 23.057 | | 20.029 | | 0.169 | | 0.731 | |  | |
| *Pycnochromis margaritifer* | | 0.065 | | 0.097 | | 0.672 | | 23.629 | | 18.429 | | 0.248 | | 0.756 | |  | |
| *Pterocaesio digramma* | | 0.052 | | 0.147 | | 0.351 | | 2.714 | | 34.600 | | 0.311 | | 0.159 | |  | |
| *Pomacentrus lepidogenys* | | 0.043 | | 0.056 | | 0.774 | | 16.486 | | 10.200 | | 0.363 | | 0.764 | |  | |
| *Pomacentrus alexanderae* | | 0.035 | | 0.048 | | 0.715 | | 5.829 | | 8.914 | | 0.405 | | 0.450 | |  | |
| *Chromis yamakawai* | | 0.033 | | 0.088 | | 0.369 | | 22.857 | | 2.943 | | 0.445 | | 0.691 | |  | |
| *Abudefduf sexfasciatus* | | 0.032 | | 0.084 | | 0.387 | | 9.600 | | 8.686 | | 0.484 | | 0.430 | |  | |
| *Caesio caerulaurea* | | 0.025 | | 0.116 | | 0.215 | | 3.000 | | 28.600 | | 0.514 | | 0.633 | |  | |
| *Chromis chrysura* | | 0.021 | | 0.031 | | 0.671 | | 5.886 | | 5.600 | | 0.540 | | 0.421 | |  | |
| *Cirrhilabrus cyanopleura* | | 0.021 | | 0.059 | | 0.347 | | 7.657 | | 0.571 | | 0.565 | | 0.347 | |  | |
| *Chromis sp.* | | 0.020 | | 0.042 | | 0.479 | | 2.257 | | 3.114 | | 0.589 | | 0.559 | |  | |
| *Pomacentrus moluccensis* | | 0.019 | | 0.029 | | 0.675 | | 4.429 | | 4.286 | | 0.612 | | 0.834 | |  | |
| *Acanthurus nigrofuscus* | | 0.019 | | 0.047 | | 0.406 | | 8.829 | | 3.686 | | 0.635 | | 0.815 | |  | |
| *Neoglyphidodon nigroris* | | 0.018 | | 0.025 | | 0.722 | | 4.029 | | 3.743 | | 0.657 | | 0.585 | |  | |
| *Pomacentrus amboinensis* | | 0.018 | | 0.041 | | 0.443 | | 3.971 | | 2.743 | | 0.679 | | 0.814 | |  | |
| *Pomacentrus vaiuli* | | 0.016 | | 0.018 | | 0.921 | | 5.200 | | 4.714 | | 0.699 | | 0.776 | |  | |
| *Ctenochaetus striatus* | | 0.012 | | 0.020 | | 0.610 | | 3.257 | | 3.314 | | 0.714 | | 0.478 | |  | |
| *Pterocaesio marri* | | 0.012 | | 0.069 | | 0.169 | | 14.286 | | 0.000 | | 0.728 | | 0.802 | |  | |
| *Ctenochaetus binotatus* | | 0.011 | | 0.012 | | 0.965 | | 4.429 | | 2.029 | | 0.742 | | 0.036 | | * | |
| *Mirolabrichthys tuka* | | 0.010 | | 0.028 | | 0.366 | | 3.314 | | 2.600 | | 0.754 | | 0.581 | |  | |
| *Chrysiptera rex* | | 0.009 | | 0.013 | | 0.699 | | 2.057 | | 2.029 | | 0.765 | | 0.679 | |  | |
| *Amblyglyphidodon curacao* | | 0.008 | | 0.020 | | 0.421 | | 0.629 | | 2.543 | | 0.775 | | 0.222 | |  | |
| *Halichoeres melanochir* | | 0.008 | | 0.010 | | 0.763 | | 1.829 | | 1.457 | | 0.784 | | 0.136 | |  | |
| *Chaetodon lunulatus* | | 0.007 | | 0.010 | | 0.753 | | 1.771 | | 1.657 | | 0.793 | | 0.747 | |  | |
| *Amblyglyphidodon leucogaster* | | 0.007 | | 0.011 | | 0.634 | | 1.600 | | 1.886 | | 0.801 | | 0.791 | |  | |
| *Pycnochromis atripes* | | 0.006 | | 0.013 | | 0.477 | | 1.286 | | 2.143 | | 0.809 | | 0.431 | |  | |
| *Pycnochromis ovatiformes* | | 0.006 | | 0.012 | | 0.520 | | 1.743 | | 1.457 | | 0.816 | | 0.861 | |  | |
| *Chlorurus spilurus* | | 0.005 | | 0.006 | | 0.718 | | 1.629 | | 0.800 | | 0.822 | | 0.585 | |  | |
| *Pomacentrus burroughi* | | 0.004 | | 0.011 | | 0.344 | | 0.257 | | 0.657 | | 0.827 | | 0.224 | |  | |
| *Centropyge ferrugata* | | 0.004 | | 0.006 | | 0.665 | | 1.086 | | 0.714 | | 0.831 | | 0.788 | |  | |
| *Chaetodon vagabundus* | | 0.003 | | 0.006 | | 0.543 | | 0.800 | | 0.457 | | 0.835 | | 0.436 | |  | |
| *Stegastes lacrymatus* | | 0.003 | | 0.007 | | 0.508 | | 0.657 | | 0.800 | | 0.840 | | 0.479 | |  | |
| *Mulloidichthys vanicolensis* | | 0.003 | | 0.011 | | 0.307 | | 0.486 | | 0.600 | | 0.844 | | 0.564 | |  | |
| *Scarus schlegeli* | | 0.003 | | 0.006 | | 0.485 | | 0.457 | | 0.629 | | 0.847 | | 0.309 | |  | |
| *Canthigaster valentini* | | 0.003 | | 0.005 | | 0.571 | | 0.657 | | 0.457 | | 0.851 | | 0.548 | |  | |
| *Acanthurus gahhm* | | 0.003 | | 0.007 | | 0.409 | | 0.457 | | 0.400 | | 0.854 | | 0.270 | |  | |
| *Chaetodon trifascialis* | | 0.003 | | 0.004 | | 0.636 | | 0.629 | | 0.714 | | 0.857 | | 0.170 | |  | |
| *Zebrasoma scopas* | | 0.003 | | 0.004 | | 0.633 | | 0.486 | | 0.857 | | 0.861 | | 0.354 | |  | |
| *Naso lituratus* | | 0.003 | | 0.004 | | 0.639 | | 0.857 | | 0.571 | | 0.864 | | 0.721 | |  | |
| *Zanclus cornutus* | | 0.003 | | 0.003 | | 0.760 | | 0.714 | | 0.657 | | 0.867 | | 0.810 | |  | |
| *Thalassoma lutescens* | | 0.003 | | 0.004 | | 0.672 | | 0.629 | | 0.714 | | 0.870 | | 0.528 | |  | |
| *Plectroglyphidodon johnstonianus* | | 0.002 | | 0.003 | | 0.677 | | 0.771 | | 0.543 | | 0.873 | | 0.706 | |  | |
| *Labroides dimidiatus* | | 0.002 | | 0.003 | | 0.670 | | 0.686 | | 0.429 | | 0.876 | | 0.199 | |  | |
| *Neoglyphidodon melas* | | 0.002 | | 0.004 | | 0.568 | | 0.429 | | 0.571 | | 0.878 | | 0.421 | |  | |
| *Dascyllus trimaculatus* | | 0.002 | | 0.006 | | 0.340 | | 0.400 | | 0.286 | | 0.881 | | 0.743 | |  | |
| *Chaetodon argentatus* | | 0.002 | | 0.005 | | 0.448 | | 0.371 | | 0.371 | | 0.883 | | 0.162 | |  | |
| *Chaetodon plebeius* | | 0.002 | | 0.004 | | 0.523 | | 0.286 | | 0.486 | | 0.886 | | 0.235 | |  | |
| *Centropyge vroliki* | | 0.002 | | 0.003 | | 0.626 | | 0.543 | | 0.229 | | 0.888 | | 0.143 | |  | |
| *Siganus virgatus* | | 0.002 | | 0.005 | | 0.388 | | 0.371 | | 0.286 | | 0.890 | | 0.446 | |  | |
| *Oxymonacanthus longirostris* | | 0.002 | | 0.004 | | 0.452 | | 0.229 | | 0.571 | | 0.893 | | 0.277 | |  | |
| *Amphiprion clarkii* | | 0.002 | | 0.006 | | 0.299 | | 0.371 | | 0.171 | | 0.895 | | 0.701 | |  | |
| *Acanthurus dussumieri* | | 0.002 | | 0.008 | | 0.230 | | 0.086 | | 0.343 | | 0.897 | | 0.396 | |  | |
| *Chaetodon auripes* | | 0.002 | | 0.004 | | 0.486 | | 0.343 | | 0.257 | | 0.900 | | 0.571 | |  | |
| *Parupeneus multifasciatus* | | 0.002 | | 0.003 | | 0.631 | | 0.257 | | 0.429 | | 0.902 | | 0.318 | |  | |
| *Amphiprion frenatus* | | 0.002 | | 0.005 | | 0.393 | | 0.343 | | 0.400 | | 0.904 | | 0.671 | |  | |
| *Scarus forsteni* | | 0.002 | | 0.003 | | 0.668 | | 0.457 | | 0.371 | | 0.906 | | 0.172 | |  | |
| *Dascyllus aruanus* | | 0.002 | | 0.006 | | 0.317 | | 0.400 | | 0.229 | | 0.909 | | 0.756 | |  | |
| *Scarus sp* | | 0.002 | | 0.006 | | 0.279 | | 0.171 | | 0.229 | | 0.911 | | 0.411 | |  | |
| *Choerodon fasciatus* | | 0.002 | | 0.003 | | 0.536 | | 0.229 | | 0.286 | | 0.913 | | 0.438 | |  | |
| *Scolopsis bilineata* | | 0.002 | | 0.003 | | 0.565 | | 0.314 | | 0.343 | | 0.915 | | 0.673 | |  | |
| *Dascyllus reticulatus* | | 0.002 | | 0.004 | | 0.368 | | 0.429 | | 0.114 | | 0.917 | | 0.461 | |  | |
| *Myripristis violacea* | | 0.002 | | 0.006 | | 0.256 | | 0.486 | | 0.000 | | 0.919 | | 0.365 | |  | |
| *Labrichthys unilineatus* | | 0.002 | | 0.004 | | 0.358 | | 0.143 | | 0.457 | | 0.921 | | 0.111 | |  | |
| *Pomacentrus brachialis* | | 0.001 | | 0.004 | | 0.405 | | 0.143 | | 0.343 | | 0.922 | | 0.439 | |  | |
| *Halichoeres melanurus* | | 0.001 | | 0.005 | | 0.283 | | 0.200 | | 0.171 | | 0.924 | | 0.585 | |  | |
| *Nemateleotris magnifica* | | 0.001 | | 0.004 | | 0.368 | | 0.343 | | 0.200 | | 0.926 | | 0.746 | |  | |
| *Myripristis murdjan* | | 0.001 | | 0.005 | | 0.275 | | 0.286 | | 0.086 | | 0.927 | | 0.654 | |  | |
| *Chrysiptera starcki* | | 0.001 | | 0.004 | | 0.284 | | 0.257 | | 0.229 | | 0.929 | | 0.627 | |  | |
| *Epibulus insidiator* | | 0.001 | | 0.002 | | 0.536 | | 0.257 | | 0.229 | | 0.930 | | 0.664 | |  | |
| *Forcipiger flavissimus* | | 0.001 | | 0.003 | | 0.412 | | 0.400 | | 0.114 | | 0.931 | | 0.268 | |  | |
| *Scarus niger* | | 0.001 | | 0.003 | | 0.341 | | 0.286 | | 0.143 | | 0.933 | | 0.725 | |  | |
| *Pycnochromis vanderbilti* | | 0.001 | | 0.006 | | 0.165 | | 0.571 | | 0.000 | | 0.934 | | 0.694 | |  | |
| *Chromis atripectoralis* | | 0.001 | | 0.006 | | 0.164 | | 0.000 | | 0.429 | | 0.935 | | 0.358 | |  | |
| *Acanthurus triostegus* | | 0.001 | | 0.006 | | 0.177 | | 0.571 | | 0.029 | | 0.937 | | 0.730 | |  | |
| *Hemigymnus fasciatus* | | 0.001 | | 0.002 | | 0.533 | | 0.257 | | 0.200 | | 0.938 | | 0.577 | |  | |
| *Sufflamen chrysopterum* | | 0.001 | | 0.002 | | 0.417 | | 0.286 | | 0.086 | | 0.939 | | 0.524 | |  | |
| *Chaetodon kleinii* | | 0.001 | | 0.002 | | 0.516 | | 0.343 | | 0.114 | | 0.940 | | 0.475 | |  | |
| *Anampses twistii* | | 0.001 | | 0.002 | | 0.549 | | 0.257 | | 0.200 | | 0.941 | | 0.754 | |  | |
| *Chaetodon auriga* | | 0.001 | | 0.003 | | 0.328 | | 0.171 | | 0.114 | | 0.943 | | 0.620 | |  | |
| *Gomphosus varius* | | 0.001 | | 0.002 | | 0.509 | | 0.143 | | 0.229 | | 0.944 | | 0.056 | |  | |
| *Choerodon schoenleinii* | | 0.001 | | 0.003 | | 0.317 | | 0.057 | | 0.171 | | 0.945 | | 0.291 | |  | |
| *Ptereleotris evides* | | 0.001 | | 0.003 | | 0.345 | | 0.229 | | 0.171 | | 0.946 | | 0.777 | |  | |
| *Plectroglyphidodon fasciolatus* | | 0.001 | | 0.002 | | 0.362 | | 0.229 | | 0.200 | | 0.947 | | 0.685 | |  | |
| *Heniochus chrysostomus* | | 0.001 | | 0.002 | | 0.441 | | 0.171 | | 0.114 | | 0.948 | | 0.783 | |  | |
| *Zebrasoma velifer* | | 0.001 | | 0.002 | | 0.422 | | 0.286 | | 0.029 | | 0.949 | | 0.192 | |  | |
| *Plectroglyphidodon dickii* | | 0.001 | | 0.002 | | 0.324 | | 0.029 | | 0.314 | | 0.950 | | 0.076 | |  | |
| *Labropsis manabei* | | 0.001 | | 0.002 | | 0.434 | | 0.229 | | 0.143 | | 0.951 | | 0.841 | |  | |
| *Lutjanus fulvus* | | 0.001 | | 0.004 | | 0.195 | | 0.029 | | 0.086 | | 0.952 | | 0.183 | |  | |
| *Heniochus varius* | | 0.001 | | 0.002 | | 0.411 | | 0.171 | | 0.143 | | 0.952 | | 0.666 | |  | |
| *Balistapus undulatus* | | 0.001 | | 0.002 | | 0.290 | | 0.143 | | 0.086 | | 0.953 | | 0.740 | |  | |
| *Abudefduf vaigiensis* | | 0.001 | | 0.004 | | 0.200 | | 0.000 | | 0.314 | | 0.954 | | 0.232 | |  | |
| *Cephalopholis urodeta* | | 0.001 | | 0.001 | | 0.462 | | 0.171 | | 0.229 | | 0.955 | | 0.516 | |  | |
| *Chaetodon ephippium* | | 0.001 | | 0.003 | | 0.260 | | 0.057 | | 0.143 | | 0.956 | | 0.357 | |  | |
| *Chaetodon bennetti* | | 0.001 | | 0.002 | | 0.273 | | 0.029 | | 0.171 | | 0.957 | | 0.286 | |  | |
| *Epinephelus merra* | | 0.001 | | 0.002 | | 0.349 | | 0.057 | | 0.171 | | 0.957 | | 0.290 | |  | |
| *Aulostomus chinensis* | | 0.001 | | 0.001 | | 0.443 | | 0.143 | | 0.143 | | 0.958 | | 0.775 | |  | |
| *Lutjanus russellii* | | 0.001 | | 0.003 | | 0.209 | | 0.114 | | 0.000 | | 0.959 | | 0.244 | |  | |
| *Pseudocheilinus hexataenia* | | 0.001 | | 0.001 | | 0.440 | | 0.143 | | 0.171 | | 0.960 | | 0.539 | |  | |
| *Azurina lepidolepis* | | 0.001 | | 0.002 | | 0.307 | | 0.171 | | 0.171 | | 0.960 | | 0.430 | |  | |
| *Thalassoma lunare* | | 0.001 | | 0.002 | | 0.317 | | 0.114 | | 0.086 | | 0.961 | | 0.671 | |  | |
| *Centropyge venusta* | | 0.001 | | 0.004 | | 0.158 | | 0.171 | | 0.000 | | 0.962 | | 0.626 | |  | |
| *Neoniphon sammara* | | 0.001 | | 0.002 | | 0.243 | | 0.114 | | 0.029 | | 0.962 | | 0.539 | |  | |
| *Coradion chrysozonus* | | 0.001 | | 0.002 | | 0.380 | | 0.143 | | 0.114 | | 0.963 | | 0.812 | |  | |
| *Genicanthus lamarck* | | 0.001 | | 0.002 | | 0.234 | | 0.057 | | 0.114 | | 0.964 | | 0.380 | |  | |
| *Chromis xanthura* | | 0.001 | | 0.002 | | 0.269 | | 0.000 | | 0.200 | | 0.964 | | 0.113 | |  | |
| *Parupeneus ciliatus* | | 0.001 | | 0.002 | | 0.224 | | 0.057 | | 0.057 | | 0.965 | | 0.448 | |  | |
| *Naso hexacanthus* | | 0.001 | | 0.003 | | 0.214 | | 0.000 | | 0.171 | | 0.966 | | 0.215 | |  | |
| *Myripristis hexagona* | | 0.001 | | 0.003 | | 0.192 | | 0.000 | | 0.143 | | 0.966 | | 0.244 | |  | |
| *Caesio teres* | | 0.000 | | 0.003 | | 0.165 | | 0.257 | | 0.000 | | 0.967 | | 0.698 | |  | |
| *Naso unicornis* | | 0.000 | | 0.001 | | 0.325 | | 0.171 | | 0.057 | | 0.968 | | 0.358 | |  | |
| *Pempheris sp* | | 0.000 | | 0.002 | | 0.302 | | 0.114 | | 0.029 | | 0.968 | | 0.201 | |  | |
| *Heniochus acuminatus* | | 0.000 | | 0.002 | | 0.269 | | 0.029 | | 0.171 | | 0.969 | | 0.464 | |  | |
| *Chaetodon lunula* | | 0.000 | | 0.002 | | 0.223 | | 0.000 | | 0.114 | | 0.969 | | 0.143 | |  | |
| *Bodianus mesothorax* | | 0.000 | | 0.001 | | 0.374 | | 0.114 | | 0.114 | | 0.970 | | 0.597 | |  | |
| *Heniochus singularis* | | 0.000 | | 0.001 | | 0.323 | | 0.057 | | 0.086 | | 0.970 | | 0.466 | |  | |
| *Psammoperca waigiensis* | | 0.000 | | 0.002 | | 0.192 | | 0.029 | | 0.057 | | 0.971 | | 0.432 | |  | |
| *Paracirrhites arcatus* | | 0.000 | | 0.001 | | 0.427 | | 0.143 | | 0.114 | | 0.972 | | 0.829 | |  | |
| *Chlorurus microrhinos* | | 0.000 | | 0.001 | | 0.355 | | 0.114 | | 0.057 | | 0.972 | | 0.761 | |  | |
| *Halichoeres biocellatus* | | 0.000 | | 0.002 | | 0.216 | | 0.143 | | 0.000 | | 0.973 | | 0.519 | |  | |
| *Naso brevirostris* | | 0.000 | | 0.001 | | 0.377 | | 0.086 | | 0.086 | | 0.973 | | 0.621 | |  | |
| *Synodus binotatus* | | 0.000 | | 0.001 | | 0.282 | | 0.057 | | 0.057 | | 0.974 | | 0.647 | |  | |
| *Sargocentron diadema* | | 0.000 | | 0.001 | | 0.334 | | 0.057 | | 0.114 | | 0.974 | | 0.598 | |  | |
| *Pygoplites diacanthus* | | 0.000 | | 0.002 | | 0.257 | | 0.057 | | 0.057 | | 0.975 | | 0.579 | |  | |
| *Paracirrhites forsteri* | | 0.000 | | 0.001 | | 0.279 | | 0.200 | | 0.000 | | 0.975 | | 0.387 | |  | |
| *Pervagor melanocephalus* | | 0.000 | | 0.001 | | 0.341 | | 0.086 | | 0.057 | | 0.976 | | 0.594 | |  | |
| *Sargocentron caudimaculatum* | | 0.000 | | 0.001 | | 0.316 | | 0.057 | | 0.057 | | 0.976 | | 0.732 | |  | |
| *Parapercis hexophthalma* | | 0.000 | | 0.002 | | 0.182 | | 0.057 | | 0.000 | | 0.976 | | 0.205 | |  | |
| *Calotomus carolinus* | | 0.000 | | 0.001 | | 0.322 | | 0.057 | | 0.086 | | 0.977 | | 0.728 | |  | |
| *Plectorhinchus chaetodonoides* | | 0.000 | | 0.001 | | 0.305 | | 0.029 | | 0.086 | | 0.977 | | 0.302 | |  | |
| *Hemitaurichthys polylepis* | | 0.000 | | 0.002 | | 0.208 | | 0.029 | | 0.057 | | 0.978 | | 0.444 | |  | |
| *Chaetodon ornatissimus* | | 0.000 | | 0.001 | | 0.351 | | 0.114 | | 0.086 | | 0.978 | | 0.428 | |  | |
| *Labroides bicolor* | | 0.000 | | 0.001 | | 0.355 | | 0.029 | | 0.143 | | 0.979 | | 0.258 | |  | |
| *Siganus unimaculatus* | | 0.000 | | 0.001 | | 0.234 | | 0.086 | | 0.086 | | 0.979 | | 0.503 | |  | |
| *Cirrhitichthys falco* | | 0.000 | | 0.001 | | 0.296 | | 0.057 | | 0.057 | | 0.979 | | 0.658 | |  | |
| *Pomacentrus nagasakiensis* | | 0.000 | | 0.001 | | 0.204 | | 0.057 | | 0.000 | | 0.980 | | 0.300 | |  | |
